# Supplementary material for: Pyloric, pseudopyloric, and spasmolytic polypeptide-expressing metaplasias in autoimmune gastritis: a case series of 22 Japanese patients
Source: PubMed Central journal article supplement (PMC8298345; doi:10.1007/s00428-021-03033-5), 2021-01-30
Supplement: 428_2021_3033_MOESM1_ESM.pdf [file 428_2021_3033_MOESM1_ESM.pdf]

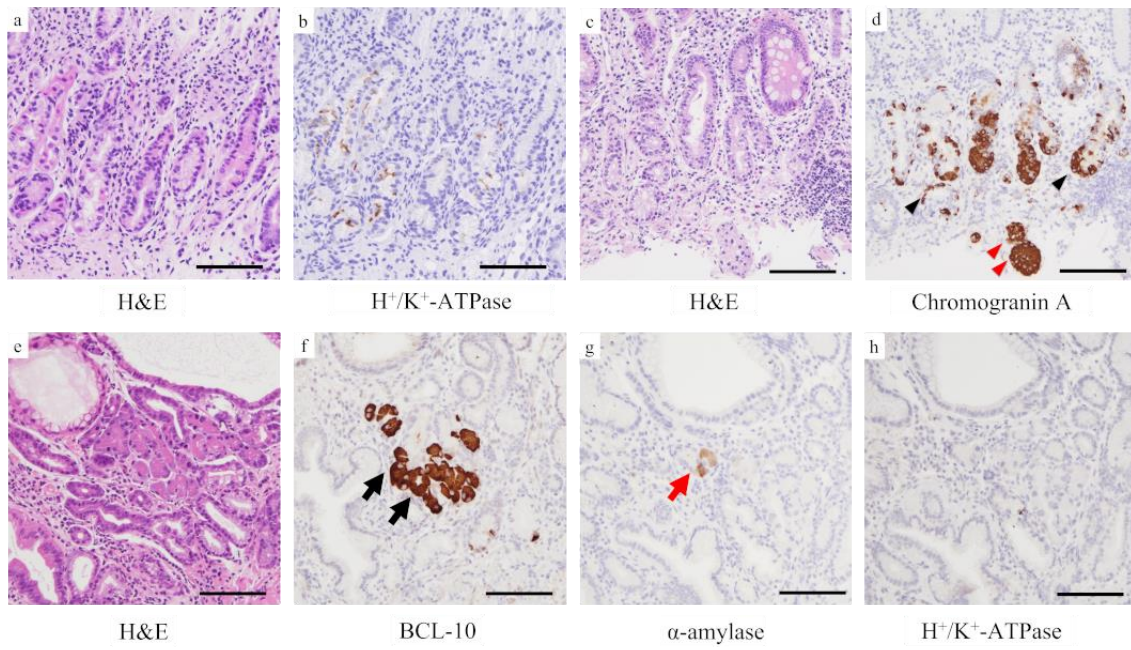

Fig.2

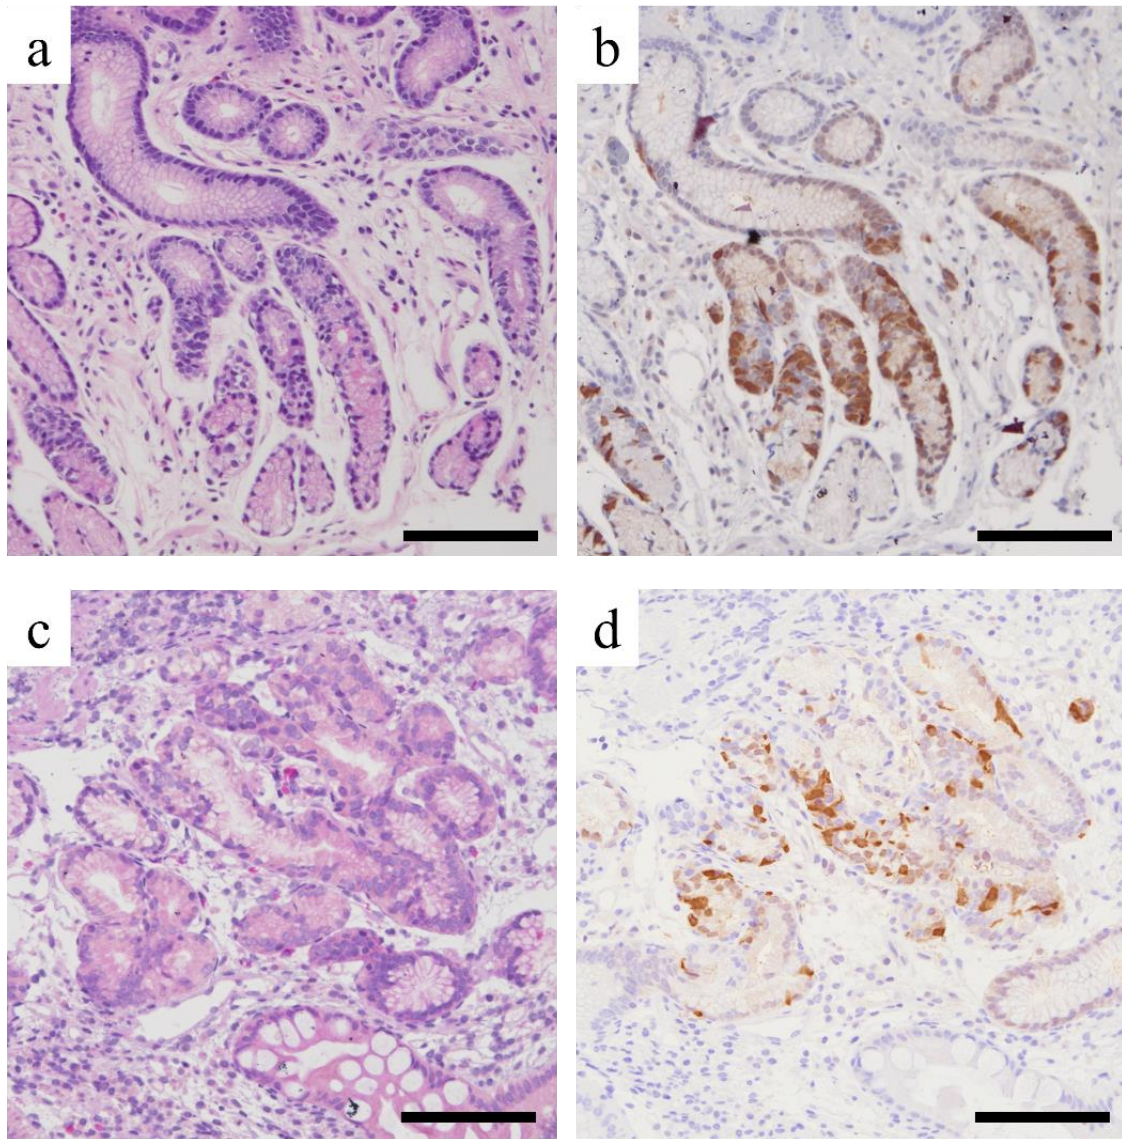

H&E

Gastrin

Fig. 3

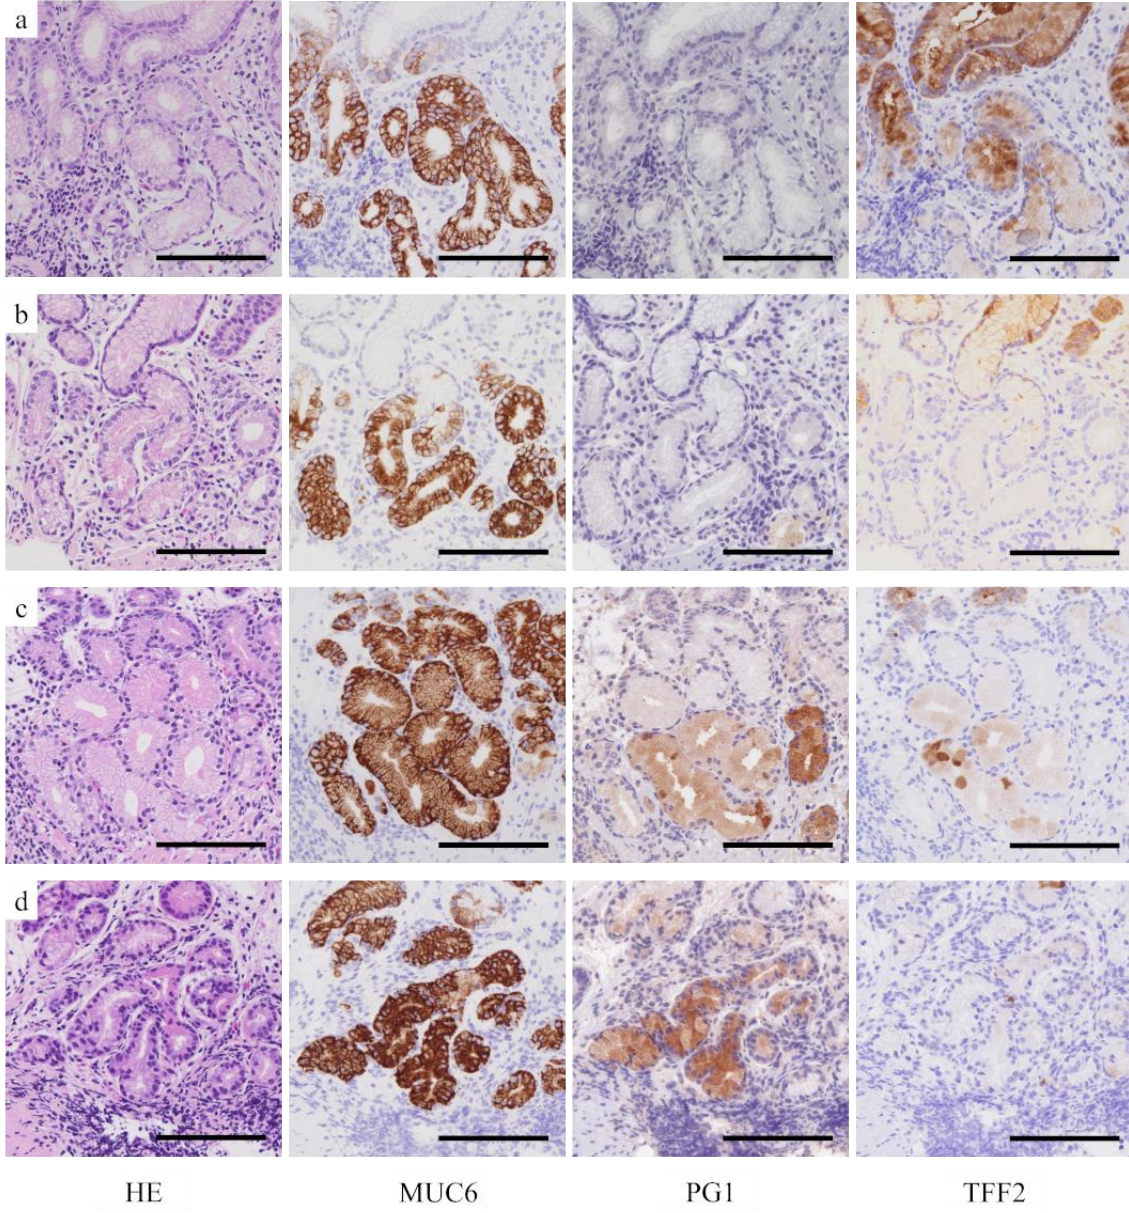

Fig. 4
